# Supplementary material for: Biosynthesis of Silver Nanoparticles Using Taxus yunnanensis Callus and Their Antibacterial Activity and Cytotoxicity in Human Cancer Cells
Source: PubMed Central journal article supplement (PMC5224640; doi:10.3390/nano6090160), 2016-09-01
Supplement: nanomaterials-06-00160-s001.pdf [file nanomaterials-06-00160-s001.pdf]

## Supplementary Materials: Biosynthesis of Silver Nanoparticles Using *Taxus yunnanensis* Callus and Their Antibacterial Activity and Cytotoxicity in Human Cancer Cells

Qian Hua Xia, Yan Jun Ma and Jian Wen Wang

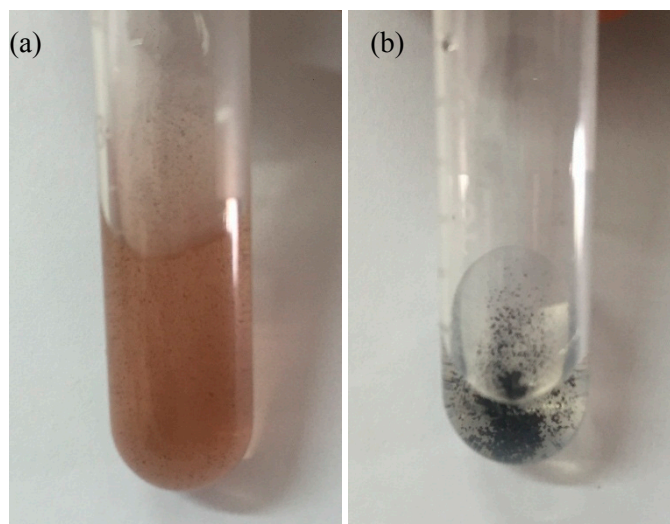

**Figure S1.** AgNPs washed by alcohol (a) and the dry powder of AgNPs redispersed into water after alcohol washing (b).
